# Supplementary material
Source: PubMed Central journal article supplement (PMC2728226)
Supplement: 10858_2009_9342_MOESM1_ESM.pdf [file 10858_2009_9342_MOESM1_ESM.pdf]

Supplementary material for:

**Probing the urea dependence of residual structure in  
denatured human  $\alpha$ -lactalbumin**

Victoria A. Higman<sup>a</sup>, Heike I. Rösner<sup>b</sup>, Raffaella Ugolini<sup>a</sup>, Lesley H. Greene<sup>a</sup>,

Christina Redfield<sup>\*b</sup> and Lorna J. Smith<sup>\*a</sup>

<sup>a</sup>Department of Chemistry, Inorganic Chemistry Laboratory

and

<sup>b</sup>Department of Biochemistry,

University of Oxford, South Parks Road, Oxford, U.K.

## 4 M urea 15N Relaxation Data

| Residue | NOE   | NOE error | R1   | R1 error | R2    | R2 error | J(0) | J(0) error | J(N) | J(N) error | J(0.87H) | J(0.87H) error |
|---------|-------|-----------|------|----------|-------|----------|------|------------|------|------------|----------|----------------|
| 1       | -0.62 | 0.06      | 1.27 | 0.04     | 2.38  | 0.06     | 0.47 | 0.02       | 0.19 | 0.01       | 0.032    | 0.002          |
| 2       | -0.35 | 0.08      | 1.48 | 0.06     | 4.10  | 0.14     | 0.93 | 0.04       | 0.23 | 0.01       | 0.031    | 0.002          |
| 3       | 0.00  | 0.12      | 1.42 | 0.10     | 4.02  | 0.27     | 0.92 | 0.08       | 0.23 | 0.02       | 0.022    | 0.003          |
| 5       |       |           | 0.99 | 0.42     | 7.56  | 1.20     |      |            |      |            |          |                |
| 6       |       |           | 1.75 | 0.15     | 9.87  | 0.91     |      |            |      |            |          |                |
| 7       |       |           | 1.20 | 0.18     | 5.64  | 0.73     |      |            |      |            |          |                |
| 8       |       |           | 1.56 | 0.12     |       |          |      |            |      |            |          |                |
| 9       | 0.43  | 0.15      | 1.60 | 0.13     | 11.25 | 0.81     | 2.96 | 0.23       | 0.28 | 0.02       | 0.014    | 0.004          |
| 13      |       |           | 1.77 | 0.26     | 6.47  | 1.52     |      |            |      |            |          |                |
| 14      | 0.50  | 0.20      | 1.45 | 0.19     | 8.59  | 0.96     | 2.19 | 0.27       | 0.26 | 0.04       | 0.011    | 0.005          |
| 17      | 0.00  | 0.21      | 1.82 | 0.17     | 8.20  | 0.87     | 2.04 | 0.26       | 0.30 | 0.03       | 0.029    | 0.007          |
| 19      | 0.00  | 0.12      | 1.58 | 0.11     | 6.74  | 0.36     | 1.65 | 0.11       | 0.26 | 0.02       | 0.025    | 0.003          |
| 20      | 0.00  | 0.12      | 1.56 | 0.07     | 5.99  | 0.21     | 1.46 | 0.06       | 0.26 | 0.01       | 0.025    | 0.003          |
| 21      | 0.00  | 0.17      | 1.38 | 0.10     | 6.09  | 0.32     | 1.51 | 0.10       | 0.23 | 0.02       | 0.022    | 0.004          |
| 22      | 0.00  | 0.16      | 1.23 | 0.15     | 9.33  | 0.99     | 2.45 | 0.29       | 0.20 | 0.03       | 0.019    | 0.004          |
| 23      |       |           | 1.56 | 0.18     | 9.57  | 1.07     |      |            |      |            |          |                |
| 26      |       |           | 1.74 | 0.17     | 7.20  | 0.61     |      |            |      |            |          |                |
| 29      | 0.00  | 0.22      | 1.89 | 0.25     | 10.08 | 1.39     | 2.57 | 0.52       | 0.31 | 0.05       | 0.030    | 0.008          |
| 33      | 0.26  | 0.11      | 1.51 | 0.08     | 6.48  | 0.32     | 1.60 | 0.09       | 0.26 | 0.02       | 0.018    | 0.003          |
| 34      | 0.00  | 0.07      | 1.69 | 0.07     | 5.12  | 0.15     | 1.18 | 0.05       | 0.28 | 0.01       | 0.026    | 0.002          |
| 35      | 0.00  | 0.06      | 1.68 | 0.06     | 4.30  | 0.11     | 0.95 | 0.03       | 0.28 | 0.01       | 0.026    | 0.002          |
| 37      | 0.17  | 0.05      | 1.67 | 0.06     | 4.88  | 0.13     | 1.13 | 0.04       | 0.28 | 0.01       | 0.022    | 0.002          |
| 38      | 0.13  | 0.04      | 1.60 | 0.04     | 5.07  | 0.09     | 1.19 | 0.02       | 0.27 | 0.01       | 0.022    | 0.001          |
| 39      | 0.21  | 0.05      | 1.65 | 0.04     | 5.20  | 0.11     | 1.22 | 0.03       | 0.28 | 0.01       | 0.020    | 0.001          |
| 40      | 0.00  | 0.07      | 1.61 | 0.05     | 4.91  | 0.12     | 1.14 | 0.03       | 0.27 | 0.01       | 0.025    | 0.002          |
| 41      | 0.00  | 0.07      | 1.58 | 0.05     | 5.56  | 0.16     | 1.33 | 0.05       | 0.26 | 0.01       | 0.025    | 0.002          |
| 42      | 0.00  | 0.11      | 1.68 | 0.10     | 5.89  | 0.25     | 1.41 | 0.07       | 0.27 | 0.02       | 0.026    | 0.003          |
| 43      | 0.00  | 0.07      | 1.58 | 0.07     | 5.38  | 0.17     | 1.27 | 0.05       | 0.26 | 0.01       | 0.025    | 0.002          |
| 45      | 0.13  | 0.06      | 1.65 | 0.05     | 4.38  | 0.09     | 0.99 | 0.03       | 0.28 | 0.01       | 0.022    | 0.002          |
| 46      | 0.10  | 0.04      | 1.68 | 0.03     | 5.12  | 0.09     | 1.19 | 0.02       | 0.28 | 0.01       | 0.024    | 0.001          |
| 47      | 0.16  | 0.05      | 1.70 | 0.04     | 4.98  | 0.07     | 1.15 | 0.02       | 0.29 | 0.01       | 0.022    | 0.001          |
| 48      | 0.23  | 0.05      | 1.83 | 0.04     | 5.17  | 0.09     | 1.19 | 0.03       | 0.31 | 0.01       | 0.022    | 0.001          |
| 50      | 0.30  | 0.06      | 1.75 | 0.05     | 5.30  | 0.13     | 1.24 | 0.04       | 0.30 | 0.01       | 0.019    | 0.002          |
| 51      | 0.19  | 0.06      | 1.74 | 0.06     | 5.32  | 0.12     | 1.24 | 0.03       | 0.29 | 0.01       | 0.022    | 0.002          |

|     |       |      |      |      |       |      |      |      |      |      |       |       |
|-----|-------|------|------|------|-------|------|------|------|------|------|-------|-------|
| 52  | 0.22  | 0.04 | 1.77 | 0.04 | 5.13  | 0.08 | 1.18 | 0.02 | 0.30 | 0.01 | 0.022 | 0.001 |
| 53  | 0.00  | 0.07 | 1.70 | 0.07 | 5.79  | 0.20 | 1.38 | 0.06 | 0.28 | 0.01 | 0.026 | 0.002 |
| 54  | 0.00  | 0.05 | 1.73 | 0.05 | 5.37  | 0.14 | 1.25 | 0.04 | 0.28 | 0.01 | 0.027 | 0.002 |
| 56  | 0.00  | 0.05 | 1.63 | 0.04 | 5.08  | 0.10 | 1.19 | 0.03 | 0.27 | 0.01 | 0.025 | 0.001 |
| 57  | 0.00  | 0.05 | 1.63 | 0.04 | 4.62  | 0.10 | 1.05 | 0.02 | 0.27 | 0.01 | 0.025 | 0.001 |
| 58  | 0.14  | 0.05 | 1.75 | 0.04 | 5.07  | 0.11 | 1.17 | 0.03 | 0.29 | 0.01 | 0.023 | 0.001 |
| 59  | 0.21  | 0.06 | 1.84 | 0.06 | 4.99  | 0.12 | 1.13 | 0.04 | 0.31 | 0.01 | 0.023 | 0.002 |
| 60  | 0.19  | 0.06 | 1.75 | 0.04 | 5.74  | 0.11 | 1.36 | 0.03 | 0.30 | 0.01 | 0.022 | 0.002 |
| 61  | 0.16  | 0.05 | 1.78 | 0.05 | 3.94  | 0.08 | 0.84 | 0.02 | 0.30 | 0.01 | 0.023 | 0.001 |
| 62  | 0.00  | 0.04 | 1.64 | 0.04 | 3.70  | 0.07 | 0.79 | 0.02 | 0.27 | 0.01 | 0.026 | 0.001 |
| 63  | 0.00  | 0.05 | 1.66 | 0.04 | 3.46  | 0.06 | 0.72 | 0.02 | 0.27 | 0.01 | 0.026 | 0.001 |
| 64  | 0.00  | 0.04 | 1.66 | 0.04 | 3.66  | 0.06 | 0.78 | 0.02 | 0.27 | 0.01 | 0.026 | 0.001 |
| 65  | -0.18 | 0.04 | 1.62 | 0.03 | 3.46  | 0.05 | 0.72 | 0.02 | 0.26 | 0.01 | 0.030 | 0.001 |
| 66  | 0.00  | 0.05 | 1.60 | 0.04 | 3.86  | 0.08 | 0.85 | 0.02 | 0.26 | 0.01 | 0.025 | 0.001 |
| 68  | -0.10 | 0.04 | 1.64 | 0.04 | 3.17  | 0.06 | 0.64 | 0.02 | 0.27 | 0.01 | 0.028 | 0.001 |
| 69  | 0.14  | 0.05 | 1.60 | 0.04 | 3.61  | 0.07 | 0.78 | 0.02 | 0.27 | 0.01 | 0.021 | 0.001 |
| 70  | 0.16  | 0.05 | 1.68 | 0.04 | 3.41  | 0.07 | 0.71 | 0.02 | 0.28 | 0.01 | 0.022 | 0.001 |
| 72  | 0.12  | 0.03 | 1.62 | 0.03 | 4.20  | 0.06 | 0.94 | 0.02 | 0.27 | 0.00 | 0.022 | 0.001 |
| 73  | 0.00  | 0.04 | 1.67 | 0.04 | 3.89  | 0.06 | 0.84 | 0.02 | 0.28 | 0.01 | 0.026 | 0.001 |
| 74  | 0.00  | 0.05 | 1.60 | 0.04 | 3.95  | 0.07 | 0.87 | 0.02 | 0.26 | 0.01 | 0.025 | 0.001 |
| 77  | 0.13  | 0.04 | 1.68 | 0.04 | 3.90  | 0.06 | 0.85 | 0.02 | 0.28 | 0.01 | 0.023 | 0.001 |
| 78  | 0.17  | 0.05 | 1.70 | 0.04 | 4.26  | 0.08 | 0.95 | 0.02 | 0.29 | 0.01 | 0.022 | 0.001 |
| 79  | 0.16  | 0.04 | 1.71 | 0.04 | 4.47  | 0.07 | 1.00 | 0.02 | 0.29 | 0.01 | 0.023 | 0.001 |
| 80  | 0.23  | 0.07 | 1.75 | 0.05 | 5.13  | 0.13 | 1.19 | 0.04 | 0.30 | 0.01 | 0.021 | 0.002 |
| 81  | 0.23  | 0.08 | 1.75 | 0.07 | 5.65  | 0.15 | 1.33 | 0.05 | 0.30 | 0.01 | 0.021 | 0.002 |
| 84  | 0.09  | 0.03 | 1.64 | 0.04 | 5.25  | 0.11 | 1.23 | 0.03 | 0.27 | 0.01 | 0.023 | 0.001 |
| 86  | 0.00  | 0.07 | 1.67 | 0.07 | 6.48  | 0.18 | 1.57 | 0.05 | 0.27 | 0.01 | 0.026 | 0.002 |
| 87  | 0.00  | 0.08 | 1.64 | 0.06 | 5.71  | 0.15 | 1.36 | 0.05 | 0.27 | 0.01 | 0.026 | 0.002 |
| 88  | 0.18  | 0.07 | 1.57 | 0.05 | 5.37  | 0.14 | 1.28 | 0.04 | 0.27 | 0.01 | 0.020 | 0.002 |
| 91  | 0.00  | 0.22 | 1.58 | 0.16 | 10.88 | 0.89 | 2.81 | 0.27 | 0.26 | 0.03 | 0.025 | 0.006 |
| 92  |       |      | 1.32 | 0.12 | 9.73  | 1.33 |      |      |      |      |       |       |
| 98  |       |      | 1.45 | 0.24 | 8.53  | 1.79 |      |      |      |      |       |       |
| 100 | 0.51  | 0.21 | 1.39 | 0.14 | 10.10 | 1.28 | 2.65 | 0.38 | 0.25 | 0.03 | 0.011 | 0.005 |
| 102 | 0.00  | 0.16 | 1.51 | 0.18 | 13.95 | 1.81 | 3.70 | 0.57 | 0.25 | 0.04 | 0.024 | 0.005 |
| 103 | 0.29  | 0.07 | 1.85 | 0.07 | 7.46  | 0.22 | 1.83 | 0.06 | 0.32 | 0.01 | 0.021 | 0.002 |
| 104 | 0.30  | 0.11 | 1.84 | 0.13 | 9.71  | 0.53 | 2.47 | 0.16 | 0.32 | 0.02 | 0.020 | 0.004 |

|     |      |      |      |      |       |      |      |      |      |      |       |       |
|-----|------|------|------|------|-------|------|------|------|------|------|-------|-------|
| 108 | 0.21 | 0.09 | 1.48 | 0.06 | 6.70  | 0.27 | 1.68 | 0.08 | 0.25 | 0.01 | 0.018 | 0.002 |
| 109 | 0.00 | 0.14 | 1.79 | 0.18 | 8.02  | 0.70 | 1.99 | 0.21 | 0.30 | 0.03 | 0.028 | 0.005 |
| 110 | 0.00 | 0.10 | 1.45 | 0.10 | 7.85  | 0.41 | 1.99 | 0.12 | 0.24 | 0.02 | 0.023 | 0.003 |
| 111 | 0.00 | 0.22 | 1.51 | 0.22 | 10.81 | 2.23 | 2.86 | 0.80 | 0.25 | 0.04 | 0.024 | 0.007 |
| 112 | 0.00 | 0.08 | 1.45 | 0.06 | 6.20  | 0.21 | 1.53 | 0.05 | 0.24 | 0.01 | 0.023 | 0.002 |
| 114 |      |      | 1.47 | 0.14 | 7.29  | 0.67 |      |      |      |      |       |       |
| 117 |      |      | 1.88 | 0.19 | 6.30  | 1.41 |      |      |      |      |       |       |
| 118 | 0.24 | 0.05 | 1.69 | 0.04 | 6.51  | 0.12 | 1.58 | 0.04 | 0.29 | 0.01 | 0.020 | 0.001 |
| 120 |      |      | 1.99 | 0.20 | 15.81 | 1.81 |      |      |      |      |       |       |
| 121 |      |      | 1.20 | 0.28 |       |      |      |      |      |      |       |       |
| 123 | 0.00 | 0.23 | 1.09 | 0.15 | 6.82  | 0.97 | 1.79 | 0.33 | 0.18 | 0.03 | 0.018 | 0.005 |

## 6 M urea 15N Relaxation Data

| Residue | NOE   | NOE error | R1   | R1 error | R2   | R2 error | J(0) | J(0) error | J(N) | J(N) error | J(0.87H) | J(0.87H) error |
|---------|-------|-----------|------|----------|------|----------|------|------------|------|------------|----------|----------------|
| 1       | -0.50 | 0.02      | 1.08 | 0.01     | 1.48 | 0.01     | 0.25 | 0.00       | 0.16 | 0.00       | 0.025    | 0.000          |
| 2       | -0.34 | 0.02      | 1.37 | 0.02     | 2.29 | 0.03     | 0.43 | 0.01       | 0.21 | 0.00       | 0.029    | 0.001          |
| 3       | -0.19 | 0.02      | 1.45 | 0.02     | 2.96 | 0.04     | 0.61 | 0.01       | 0.23 | 0.00       | 0.027    | 0.001          |
| 4       | 0.16  | 0.03      | 1.58 | 0.03     | 5.55 | 0.11     | 1.33 | 0.03       | 0.27 | 0.00       | 0.021    | 0.001          |
| 5       | 0.15  | 0.03      | 1.63 | 0.03     | 4.32 | 0.08     | 0.98 | 0.02       | 0.27 | 0.01       | 0.022    | 0.001          |
| 6       | 0.15  | 0.03      | 1.62 | 0.03     | 6.02 | 0.11     | 1.45 | 0.03       | 0.27 | 0.00       | 0.021    | 0.001          |
| 7       | 0.16  | 0.03      | 1.59 | 0.03     | 4.63 | 0.10     | 1.07 | 0.03       | 0.27 | 0.01       | 0.021    | 0.001          |
| 8       | 0.25  | 0.03      | 1.69 | 0.03     | 6.33 | 0.15     | 1.53 | 0.05       | 0.29 | 0.01       | 0.020    | 0.001          |
| 9       | 0.23  | 0.02      | 1.59 | 0.02     | 6.00 | 0.09     | 1.45 | 0.02       | 0.27 | 0.00       | 0.019    | 0.001          |
| 10      |       |           | 1.60 | 0.04     |      |          |      |            |      |            |          |                |
| 11      | 0.23  | 0.03      | 1.63 | 0.02     | 5.35 | 0.08     | 1.27 | 0.02       | 0.28 | 0.00       | 0.020    | 0.001          |
| 12      | 0.23  | 0.04      | 1.54 | 0.04     | 8.24 | 0.22     | 2.11 | 0.06       | 0.26 | 0.01       | 0.018    | 0.001          |
| 16      | 0.21  | 0.03      | 1.77 | 0.04     | 5.98 | 0.13     | 1.42 | 0.04       | 0.30 | 0.01       | 0.022    | 0.001          |
| 17      | 0.16  | 0.02      | 1.53 | 0.02     | 4.02 | 0.06     | 0.90 | 0.01       | 0.26 | 0.00       | 0.020    | 0.001          |
| 19      | 0.00  | 0.02      | 1.50 | 0.02     | 3.43 | 0.05     | 0.74 | 0.01       | 0.25 | 0.00       | 0.023    | 0.001          |
| 20      | 0.10  | 0.02      | 1.51 | 0.02     | 2.96 | 0.03     | 0.61 | 0.01       | 0.25 | 0.00       | 0.021    | 0.000          |
| 21      | 0.08  | 0.03      | 1.52 | 0.02     | 3.68 | 0.05     | 0.81 | 0.02       | 0.25 | 0.00       | 0.022    | 0.001          |
| 22      | 0.05  | 0.02      | 1.47 | 0.02     | 4.15 | 0.07     | 0.95 | 0.02       | 0.24 | 0.00       | 0.022    | 0.001          |
| 23      | 0.09  | 0.03      | 1.41 | 0.02     | 4.70 | 0.09     | 1.11 | 0.03       | 0.23 | 0.00       | 0.020    | 0.001          |
| 26      | 0.21  | 0.03      | 1.51 | 0.03     | 5.24 | 0.13     | 1.25 | 0.04       | 0.26 | 0.01       | 0.019    | 0.001          |
| 28      |       |           | 1.47 | 0.06     |      |          |      |            |      |            |          |                |
| 29      | 0.11  | 0.03      | 1.49 | 0.03     | 5.49 | 0.13     | 1.33 | 0.03       | 0.25 | 0.00       | 0.021    | 0.001          |
| 31      | 0.19  | 0.04      | 1.47 | 0.04     | 7.93 | 0.25     | 2.02 | 0.07       | 0.25 | 0.01       | 0.019    | 0.001          |
| 33      | 0.12  | 0.02      | 1.49 | 0.02     | 3.70 | 0.06     | 0.82 | 0.02       | 0.25 | 0.00       | 0.020    | 0.001          |
| 34      | 0.09  | 0.02      | 1.52 | 0.02     | 3.39 | 0.04     | 0.72 | 0.01       | 0.25 | 0.00       | 0.022    | 0.001          |
| 35      | 0.00  | 0.02      | 1.47 | 0.02     | 2.88 | 0.03     | 0.59 | 0.01       | 0.24 | 0.00       | 0.023    | 0.000          |
| 37      | 0.15  | 0.02      | 1.62 | 0.02     | 3.34 | 0.04     | 0.70 | 0.01       | 0.27 | 0.00       | 0.021    | 0.001          |
| 38      | 0.10  | 0.02      | 1.57 | 0.02     | 3.41 | 0.04     | 0.72 | 0.01       | 0.26 | 0.00       | 0.022    | 0.000          |
| 39      | 0.15  | 0.02      | 1.61 | 0.02     | 3.52 | 0.04     | 0.75 | 0.01       | 0.27 | 0.00       | 0.021    | 0.001          |
| 40      | 0.07  | 0.02      | 1.49 | 0.02     | 3.30 | 0.03     | 0.71 | 0.01       | 0.25 | 0.00       | 0.022    | 0.001          |
| 42      | 0.11  | 0.03      | 1.57 | 0.03     | 3.67 | 0.06     | 0.80 | 0.02       | 0.26 | 0.01       | 0.022    | 0.001          |
| 43      | 0.11  | 0.02      | 1.54 | 0.02     | 3.68 | 0.05     | 0.80 | 0.02       | 0.26 | 0.00       | 0.021    | 0.001          |
| 44      | 0.17  | 0.02      | 1.50 | 0.02     | 3.39 | 0.05     | 0.73 | 0.01       | 0.25 | 0.00       | 0.020    | 0.001          |
| 45      | 0.18  | 0.02      | 1.60 | 0.02     | 3.43 | 0.04     | 0.73 | 0.01       | 0.27 | 0.00       | 0.020    | 0.001          |

|    |       |      |      |      |      |      |      |      |      |      |       |       |
|----|-------|------|------|------|------|------|------|------|------|------|-------|-------|
| 47 | 0.16  | 0.02 | 1.57 | 0.02 | 3.45 | 0.03 | 0.74 | 0.01 | 0.26 | 0.00 | 0.021 | 0.000 |
| 48 | 0.24  | 0.02 | 1.60 | 0.02 | 3.64 | 0.04 | 0.79 | 0.01 | 0.27 | 0.00 | 0.019 | 0.001 |
| 50 | 0.25  | 0.02 | 1.71 | 0.02 | 3.91 | 0.05 | 0.85 | 0.01 | 0.29 | 0.00 | 0.020 | 0.001 |
| 51 | 0.15  | 0.02 | 1.63 | 0.02 | 3.44 | 0.04 | 0.73 | 0.01 | 0.27 | 0.00 | 0.021 | 0.001 |
| 52 | 0.19  | 0.02 | 1.66 | 0.02 | 3.69 | 0.04 | 0.79 | 0.01 | 0.28 | 0.00 | 0.021 | 0.001 |
| 53 | 0.13  | 0.02 | 1.61 | 0.02 | 3.67 | 0.05 | 0.79 | 0.02 | 0.27 | 0.00 | 0.022 | 0.001 |
| 54 | 0.13  | 0.03 | 1.64 | 0.03 | 3.71 | 0.05 | 0.80 | 0.02 | 0.27 | 0.00 | 0.022 | 0.001 |
| 55 | 0.07  | 0.02 | 1.55 | 0.02 | 3.73 | 0.05 | 0.82 | 0.02 | 0.26 | 0.00 | 0.022 | 0.001 |
| 56 | 0.15  | 0.01 | 1.63 | 0.01 | 3.69 | 0.03 | 0.80 | 0.01 | 0.27 | 0.00 | 0.022 | 0.000 |
| 57 | 0.07  | 0.02 | 1.55 | 0.02 | 3.60 | 0.05 | 0.78 | 0.01 | 0.26 | 0.00 | 0.022 | 0.001 |
| 58 | 0.13  | 0.02 | 1.63 | 0.02 | 3.74 | 0.05 | 0.81 | 0.01 | 0.27 | 0.00 | 0.022 | 0.001 |
| 59 | 0.25  | 0.02 | 1.67 | 0.02 | 3.83 | 0.05 | 0.83 | 0.01 | 0.29 | 0.00 | 0.019 | 0.001 |
| 60 | 0.10  | 0.02 | 1.56 | 0.02 | 3.67 | 0.05 | 0.80 | 0.01 | 0.26 | 0.00 | 0.022 | 0.001 |
| 61 | 0.11  | 0.02 | 1.55 | 0.02 | 3.24 | 0.04 | 0.68 | 0.01 | 0.26 | 0.00 | 0.021 | 0.000 |
| 62 | 0.05  | 0.02 | 1.45 | 0.02 | 3.21 | 0.04 | 0.69 | 0.01 | 0.24 | 0.00 | 0.021 | 0.000 |
| 63 | 0.09  | 0.02 | 1.47 | 0.02 | 3.16 | 0.04 | 0.67 | 0.01 | 0.25 | 0.00 | 0.021 | 0.001 |
| 64 | -0.07 | 0.02 | 1.43 | 0.01 | 3.11 | 0.03 | 0.66 | 0.01 | 0.23 | 0.00 | 0.024 | 0.001 |
| 65 | -0.06 | 0.02 | 1.48 | 0.02 | 2.97 | 0.03 | 0.61 | 0.01 | 0.24 | 0.00 | 0.024 | 0.001 |
| 66 | 0.00  | 0.02 | 1.48 | 0.02 | 3.14 | 0.04 | 0.66 | 0.01 | 0.24 | 0.00 | 0.023 | 0.001 |
| 68 | -0.05 | 0.02 | 1.48 | 0.02 | 3.07 | 0.04 | 0.64 | 0.01 | 0.24 | 0.00 | 0.024 | 0.001 |
| 69 | 0.00  | 0.02 | 1.39 | 0.02 | 3.20 | 0.04 | 0.69 | 0.01 | 0.23 | 0.00 | 0.022 | 0.000 |
| 70 | 0.09  | 0.02 | 1.50 | 0.02 | 3.17 | 0.04 | 0.66 | 0.01 | 0.25 | 0.00 | 0.021 | 0.001 |
| 71 | 0.19  | 0.02 | 1.57 | 0.02 | 3.09 | 0.04 | 0.63 | 0.01 | 0.27 | 0.00 | 0.020 | 0.001 |
| 72 | 0.12  | 0.02 | 1.45 | 0.02 | 3.23 | 0.04 | 0.69 | 0.01 | 0.24 | 0.00 | 0.020 | 0.001 |
| 73 |       |      | 1.57 | 0.02 |      |      |      |      |      |      |       |       |
| 74 | 0.07  | 0.02 | 1.49 | 0.02 | 3.25 | 0.04 | 0.69 | 0.01 | 0.25 | 0.00 | 0.022 | 0.001 |
| 77 | 0.08  | 0.02 | 1.49 | 0.01 | 3.17 | 0.03 | 0.67 | 0.01 | 0.25 | 0.00 | 0.022 | 0.000 |
| 78 | 0.14  | 0.02 | 1.52 | 0.01 | 3.44 | 0.03 | 0.74 | 0.01 | 0.25 | 0.00 | 0.021 | 0.000 |
| 80 | 0.22  | 0.02 | 1.68 | 0.02 | 3.77 | 0.05 | 0.81 | 0.01 | 0.29 | 0.00 | 0.021 | 0.001 |
| 81 | 0.20  | 0.02 | 1.67 | 0.02 | 3.78 | 0.05 | 0.81 | 0.01 | 0.28 | 0.00 | 0.021 | 0.001 |
| 86 | 0.18  | 0.02 | 1.61 | 0.02 | 4.04 | 0.05 | 0.89 | 0.01 | 0.27 | 0.00 | 0.021 | 0.001 |
| 88 | 0.00  | 0.02 | 1.59 | 0.02 | 3.52 | 0.04 | 0.75 | 0.01 | 0.26 | 0.00 | 0.025 | 0.001 |
| 89 | 0.08  | 0.02 | 1.51 | 0.02 | 3.56 | 0.04 | 0.77 | 0.01 | 0.25 | 0.00 | 0.022 | 0.001 |
| 90 | 0.09  | 0.03 | 1.53 | 0.03 | 5.96 | 0.12 | 1.45 | 0.03 | 0.25 | 0.00 | 0.022 | 0.001 |
| 91 | 0.09  | 0.02 | 1.39 | 0.02 | 4.09 | 0.06 | 0.95 | 0.02 | 0.23 | 0.00 | 0.020 | 0.001 |
| 92 | -0.03 | 0.02 | 1.33 | 0.02 | 3.97 | 0.06 | 0.92 | 0.02 | 0.22 | 0.00 | 0.021 | 0.001 |

|     |       |      |      |      |      |      |      |      |      |      |       |       |
|-----|-------|------|------|------|------|------|------|------|------|------|-------|-------|
| 93  | 0.04  | 0.02 | 1.30 | 0.02 | 4.63 | 0.09 | 1.11 | 0.02 | 0.21 | 0.00 | 0.019 | 0.001 |
| 94  | 0.08  | 0.04 | 1.54 | 0.04 | 6.53 | 0.20 | 1.61 | 0.06 | 0.26 | 0.01 | 0.022 | 0.001 |
| 95  | 0.15  | 0.04 | 1.49 | 0.05 | 6.53 | 0.25 | 1.62 | 0.07 | 0.25 | 0.01 | 0.020 | 0.001 |
| 96  | 0.09  | 0.04 | 1.49 | 0.04 | 7.48 | 0.25 | 1.89 | 0.08 | 0.25 | 0.01 | 0.021 | 0.001 |
| 97  | 0.12  | 0.03 | 1.52 | 0.03 | 5.25 | 0.12 | 1.26 | 0.03 | 0.25 | 0.00 | 0.021 | 0.001 |
| 98  | 0.19  | 0.03 | 1.46 | 0.02 | 4.52 | 0.07 | 1.06 | 0.02 | 0.25 | 0.00 | 0.019 | 0.001 |
| 99  | 0.14  | 0.03 | 1.56 | 0.03 | 6.50 | 0.14 | 1.60 | 0.04 | 0.26 | 0.00 | 0.021 | 0.001 |
| 100 | 0.14  | 0.03 | 1.57 | 0.02 | 4.33 | 0.07 | 0.99 | 0.02 | 0.26 | 0.00 | 0.021 | 0.001 |
| 101 | 0.32  | 0.03 | 1.57 | 0.02 | 4.52 | 0.07 | 1.05 | 0.02 | 0.27 | 0.00 | 0.017 | 0.001 |
| 102 | 0.21  | 0.03 | 1.65 | 0.03 | 5.44 | 0.09 | 1.29 | 0.03 | 0.28 | 0.00 | 0.020 | 0.001 |
| 103 | 0.36  | 0.02 | 1.68 | 0.02 | 5.03 | 0.06 | 1.17 | 0.01 | 0.29 | 0.00 | 0.017 | 0.001 |
| 104 | 0.36  | 0.03 | 1.78 | 0.03 | 5.69 | 0.09 | 1.34 | 0.03 | 0.31 | 0.00 | 0.018 | 0.001 |
| 105 | 0.24  | 0.04 | 1.71 | 0.04 | 6.71 | 0.19 | 1.64 | 0.05 | 0.29 | 0.01 | 0.020 | 0.001 |
| 106 | 0.28  | 0.03 | 1.59 | 0.03 | 6.53 | 0.14 | 1.61 | 0.04 | 0.27 | 0.00 | 0.018 | 0.001 |
| 107 | 0.14  | 0.04 | 1.52 | 0.03 | 4.56 | 0.09 | 1.06 | 0.02 | 0.26 | 0.00 | 0.020 | 0.001 |
| 108 | 0.14  | 0.03 | 1.48 | 0.02 | 4.04 | 0.06 | 0.91 | 0.02 | 0.25 | 0.00 | 0.020 | 0.001 |
| 109 | 0.04  | 0.02 | 1.48 | 0.02 | 4.34 | 0.06 | 1.00 | 0.02 | 0.24 | 0.00 | 0.022 | 0.001 |
| 112 | -0.04 | 0.02 | 1.45 | 0.02 | 3.53 | 0.05 | 0.77 | 0.01 | 0.24 | 0.00 | 0.024 | 0.001 |
| 113 | 0.13  | 0.02 | 1.50 | 0.02 | 3.75 | 0.05 | 0.83 | 0.02 | 0.25 | 0.00 | 0.020 | 0.001 |
| 114 | 0.11  | 0.03 | 1.54 | 0.03 | 5.08 | 0.09 | 1.20 | 0.02 | 0.26 | 0.00 | 0.021 | 0.001 |
| 115 | 0.09  | 0.03 | 1.59 | 0.03 | 4.74 | 0.08 | 1.10 | 0.03 | 0.27 | 0.00 | 0.023 | 0.001 |
| 117 | 0.21  | 0.02 | 1.62 | 0.02 | 4.18 | 0.06 | 0.94 | 0.02 | 0.27 | 0.00 | 0.020 | 0.001 |
| 118 | 0.17  | 0.02 | 1.70 | 0.02 | 3.86 | 0.05 | 0.83 | 0.01 | 0.29 | 0.00 | 0.022 | 0.001 |
| 119 | 0.21  | 0.03 | 1.67 | 0.03 | 5.82 | 0.12 | 1.39 | 0.04 | 0.28 | 0.01 | 0.020 | 0.001 |
| 120 | 0.06  | 0.02 | 1.54 | 0.02 | 4.69 | 0.06 | 1.09 | 0.02 | 0.26 | 0.00 | 0.023 | 0.001 |
| 121 | -0.16 | 0.03 | 1.49 | 0.02 | 3.73 | 0.06 | 0.82 | 0.02 | 0.24 | 0.00 | 0.027 | 0.001 |
| 122 | -0.14 | 0.02 | 1.44 | 0.02 | 3.48 | 0.05 | 0.76 | 0.02 | 0.23 | 0.00 | 0.026 | 0.001 |
| 123 |       |      |      |      | 2.35 | 0.03 |      |      |      |      |       |       |

## 8 M urea 15N Relaxation Data

| Residue | NOE   | NOE error | R1   | R1 error | R2   | R2 error | J(0) | J(0) error | J(N) | J(N) error | J(0.87H) | J(0.87H) error |
|---------|-------|-----------|------|----------|------|----------|------|------------|------|------------|----------|----------------|
| 1       | -0.67 | 0.03      | 1.20 | 0.01     | 1.79 | 0.01     | 0.31 | 0.00       | 0.18 | 0.00       | 0.031    | 0.001          |
| 2       | -0.25 | 0.01      | 1.41 | 0.01     | 2.54 | 0.02     | 0.50 | 0.01       | 0.22 | 0.00       | 0.028    | 0.000          |
| 3       | 0.15  | 0.00      | 1.56 | 0.01     | 4.00 | 0.03     | 0.89 | 0.01       | 0.26 | 0.00       | 0.021    | 0.000          |
| 5       | 0.22  | 0.01      | 1.62 | 0.02     | 4.63 | 0.07     | 1.06 | 0.02       | 0.28 | 0.00       | 0.020    | 0.000          |
| 6       | 0.24  | 0.02      | 1.56 | 0.02     | 5.67 | 0.09     | 1.37 | 0.03       | 0.27 | 0.00       | 0.018    | 0.001          |
| 7       | 0.20  | 0.02      | 1.58 | 0.02     | 4.95 | 0.08     | 1.16 | 0.02       | 0.27 | 0.00       | 0.020    | 0.000          |
| 9       | 0.28  | 0.01      | 1.59 | 0.02     | 5.86 | 0.08     | 1.41 | 0.02       | 0.27 | 0.00       | 0.018    | 0.000          |
| 11      | 0.33  | 0.01      | 1.64 | 0.02     | 5.72 | 0.09     | 1.37 | 0.03       | 0.28 | 0.00       | 0.017    | 0.000          |
| 16      | 0.34  | 0.01      | 1.68 | 0.02     | 5.54 | 0.09     | 1.31 | 0.03       | 0.29 | 0.00       | 0.017    | 0.000          |
| 17      | 0.19  | 0.01      | 1.53 | 0.01     | 4.17 | 0.04     | 0.95 | 0.01       | 0.26 | 0.00       | 0.019    | 0.000          |
| 19      | 0.09  | 0.00      | 1.56 | 0.01     | 3.70 | 0.04     | 0.81 | 0.01       | 0.26 | 0.00       | 0.022    | 0.000          |
| 20      | 0.13  | 0.00      | 1.51 | 0.01     | 3.41 | 0.03     | 0.73 | 0.01       | 0.25 | 0.00       | 0.021    | 0.000          |
| 21      | 0.17  | 0.00      | 1.47 | 0.01     | 4.14 | 0.04     | 0.94 | 0.01       | 0.25 | 0.00       | 0.019    | 0.000          |
| 22      | 0.00  | 0.00      | 1.49 | 0.01     | 4.36 | 0.06     | 1.00 | 0.02       | 0.24 | 0.00       | 0.023    | 0.000          |
| 23      | 0.18  | 0.00      | 1.43 | 0.02     | 4.80 | 0.07     | 1.14 | 0.02       | 0.24 | 0.00       | 0.018    | 0.000          |
| 25      | 0.18  | 0.02      | 1.50 | 0.03     | 6.71 | 0.21     | 1.67 | 0.06       | 0.25 | 0.00       | 0.019    | 0.001          |
| 26      | 0.19  | 0.02      | 1.51 | 0.02     | 5.39 | 0.11     | 1.29 | 0.03       | 0.26 | 0.00       | 0.019    | 0.001          |
| 28      | 0.14  | 0.02      | 1.52 | 0.03     | 7.56 | 0.23     | 1.91 | 0.06       | 0.26 | 0.00       | 0.020    | 0.001          |
| 29      | 0.11  | 0.01      | 1.38 | 0.02     | 5.31 | 0.11     | 1.29 | 0.03       | 0.23 | 0.00       | 0.019    | 0.000          |
| 32      | 0.16  | 0.00      | 1.57 | 0.02     | 4.52 | 0.08     | 1.04 | 0.02       | 0.26 | 0.00       | 0.020    | 0.000          |
| 33      | 0.16  | 0.01      | 1.52 | 0.02     | 4.10 | 0.05     | 0.93 | 0.01       | 0.26 | 0.00       | 0.020    | 0.000          |
| 34      | 0.17  | 0.01      | 1.54 | 0.01     | 3.91 | 0.04     | 0.87 | 0.01       | 0.26 | 0.00       | 0.020    | 0.000          |
| 35      | 0.09  | 0.00      | 1.53 | 0.01     | 3.31 | 0.03     | 0.70 | 0.01       | 0.26 | 0.00       | 0.022    | 0.000          |
| 38      | 0.24  | 0.01      | 1.59 | 0.01     | 3.97 | 0.04     | 0.88 | 0.01       | 0.27 | 0.00       | 0.019    | 0.000          |
| 39      | 0.28  | 0.02      | 1.62 | 0.01     | 4.32 | 0.04     | 0.97 | 0.01       | 0.28 | 0.00       | 0.018    | 0.001          |
| 40      | 0.12  | 0.00      | 1.50 | 0.01     | 3.99 | 0.04     | 0.90 | 0.01       | 0.25 | 0.00       | 0.021    | 0.000          |
| 42      | 0.21  | 0.00      | 1.55 | 0.02     | 4.41 | 0.07     | 1.01 | 0.02       | 0.26 | 0.00       | 0.019    | 0.000          |
| 43      | 0.22  | 0.01      | 1.54 | 0.02     | 4.39 | 0.07     | 1.01 | 0.02       | 0.26 | 0.00       | 0.019    | 0.000          |
| 44      | 0.15  | 0.01      | 1.56 | 0.01     | 4.13 | 0.05     | 0.93 | 0.01       | 0.26 | 0.00       | 0.021    | 0.000          |
| 45      | 0.16  | 0.01      | 1.53 | 0.01     | 3.99 | 0.04     | 0.89 | 0.01       | 0.26 | 0.00       | 0.020    | 0.000          |
| 46      | 0.17  | 0.01      | 1.57 | 0.01     | 4.08 | 0.04     | 0.92 | 0.01       | 0.27 | 0.00       | 0.020    | 0.000          |
| 47      | 0.18  | 0.01      | 1.55 | 0.01     | 4.04 | 0.04     | 0.90 | 0.01       | 0.26 | 0.00       | 0.020    | 0.000          |
| 50      | 0.30  | 0.01      | 1.65 | 0.02     | 4.47 | 0.05     | 1.01 | 0.02       | 0.28 | 0.00       | 0.018    | 0.000          |
| 51      | 0.28  | 0.01      | 1.64 | 0.01     | 4.00 | 0.04     | 0.89 | 0.01       | 0.28 | 0.00       | 0.018    | 0.000          |



|     |      |      |      |      |      |      |      |      |      |      |       |       |
|-----|------|------|------|------|------|------|------|------|------|------|-------|-------|
| 52  | 0.35 | 0.01 | 1.62 | 0.01 | 4.43 | 0.04 | 1.01 | 0.01 | 0.28 | 0.00 | 0.016 | 0.000 |
| 53  | 0.26 | 0.01 | 1.59 | 0.02 | 4.41 | 0.06 | 1.01 | 0.02 | 0.27 | 0.00 | 0.018 | 0.000 |
| 54  | 0.27 | 0.01 | 1.59 | 0.02 | 4.41 | 0.06 | 1.01 | 0.02 | 0.27 | 0.00 | 0.018 | 0.000 |
| 57  | 0.25 | 0.01 | 1.53 | 0.01 | 4.29 | 0.05 | 0.98 | 0.02 | 0.26 | 0.00 | 0.018 | 0.000 |
| 59  | 0.26 | 0.01 | 1.62 | 0.02 | 4.59 | 0.06 | 1.05 | 0.02 | 0.28 | 0.00 | 0.019 | 0.000 |
| 60  | 0.29 | 0.02 | 1.53 | 0.02 | 4.36 | 0.06 | 1.00 | 0.02 | 0.26 | 0.00 | 0.017 | 0.000 |
| 61  | 0.23 | 0.01 | 1.55 | 0.01 | 3.97 | 0.04 | 0.89 | 0.01 | 0.26 | 0.00 | 0.019 | 0.000 |
| 62  | 0.16 | 0.02 | 1.50 | 0.01 | 3.99 | 0.05 | 0.90 | 0.01 | 0.25 | 0.00 | 0.020 | 0.000 |
| 63  | 0.10 | 0.01 | 1.47 | 0.01 | 3.92 | 0.04 | 0.88 | 0.01 | 0.24 | 0.00 | 0.021 | 0.000 |
| 64  | 0.10 | 0.02 | 1.47 | 0.01 | 3.87 | 0.04 | 0.87 | 0.01 | 0.25 | 0.00 | 0.021 | 0.000 |
| 65  | 0.06 | 0.00 | 1.53 | 0.01 | 3.61 | 0.04 | 0.79 | 0.01 | 0.25 | 0.00 | 0.022 | 0.000 |
| 69  | 0.14 | 0.01 | 1.48 | 0.01 | 4.02 | 0.05 | 0.91 | 0.01 | 0.25 | 0.00 | 0.020 | 0.000 |
| 70  | 0.20 | 0.02 | 1.53 | 0.02 | 3.97 | 0.05 | 0.89 | 0.01 | 0.26 | 0.00 | 0.019 | 0.000 |
| 71  | 0.19 | 0.01 | 1.62 | 0.01 | 3.87 | 0.04 | 0.85 | 0.01 | 0.27 | 0.00 | 0.020 | 0.000 |
| 72  | 0.19 | 0.01 | 1.51 | 0.01 | 3.86 | 0.04 | 0.86 | 0.01 | 0.26 | 0.00 | 0.019 | 0.000 |
| 73  | 0.16 | 0.01 | 1.62 | 0.01 | 4.32 | 0.04 | 0.98 | 0.01 | 0.27 | 0.00 | 0.021 | 0.000 |
| 74  | 0.15 | 0.01 | 1.52 | 0.01 | 4.01 | 0.04 | 0.90 | 0.01 | 0.25 | 0.00 | 0.020 | 0.000 |
| 77  | 0.16 | 0.01 | 1.55 | 0.01 | 3.91 | 0.04 | 0.87 | 0.01 | 0.26 | 0.00 | 0.020 | 0.000 |
| 78  | 0.23 | 0.00 | 1.56 | 0.01 | 4.12 | 0.04 | 0.93 | 0.01 | 0.26 | 0.00 | 0.019 | 0.000 |
| 79  | 0.24 | 0.01 | 1.61 | 0.01 | 4.75 | 0.04 | 1.10 | 0.01 | 0.27 | 0.00 | 0.019 | 0.000 |
| 81  | 0.30 | 0.01 | 1.66 | 0.02 | 4.57 | 0.05 | 1.04 | 0.01 | 0.28 | 0.00 | 0.018 | 0.000 |
| 86  | 0.23 | 0.02 | 1.60 | 0.02 | 4.67 | 0.06 | 1.08 | 0.02 | 0.27 | 0.00 | 0.019 | 0.000 |
| 87  | 0.21 | 0.01 | 1.61 | 0.01 | 4.40 | 0.05 | 1.00 | 0.02 | 0.27 | 0.00 | 0.020 | 0.000 |
| 89  | 0.18 | 0.00 | 1.55 | 0.01 | 4.17 | 0.05 | 0.94 | 0.01 | 0.26 | 0.00 | 0.020 | 0.000 |
| 90  | 0.12 | 0.01 | 1.55 | 0.02 | 4.92 | 0.08 | 1.16 | 0.02 | 0.26 | 0.00 | 0.021 | 0.000 |
| 91  | 0.07 | 0.00 | 1.45 | 0.02 | 4.08 | 0.05 | 0.93 | 0.01 | 0.24 | 0.00 | 0.021 | 0.000 |
| 92  | 0.00 | 0.00 | 1.39 | 0.01 | 4.18 | 0.05 | 0.97 | 0.02 | 0.23 | 0.00 | 0.022 | 0.000 |
| 93  | 0.14 | 0.01 | 1.40 | 0.02 | 4.52 | 0.07 | 1.07 | 0.02 | 0.24 | 0.00 | 0.019 | 0.000 |
| 94  | 0.17 | 0.01 | 1.50 | 0.02 | 4.96 | 0.10 | 1.18 | 0.03 | 0.25 | 0.00 | 0.019 | 0.000 |
| 95  | 0.15 | 0.01 | 1.51 | 0.03 | 5.19 | 0.12 | 1.23 | 0.04 | 0.25 | 0.00 | 0.020 | 0.000 |
| 96  | 0.22 | 0.01 | 1.55 | 0.02 | 5.50 | 0.13 | 1.32 | 0.03 | 0.26 | 0.00 | 0.019 | 0.000 |
| 97  | 0.20 | 0.01 | 1.53 | 0.02 | 4.98 | 0.08 | 1.18 | 0.02 | 0.26 | 0.00 | 0.019 | 0.000 |
| 98  | 0.23 | 0.01 | 1.43 | 0.02 | 4.83 | 0.07 | 1.15 | 0.02 | 0.24 | 0.00 | 0.017 | 0.000 |
| 99  | 0.26 | 0.02 | 1.57 | 0.02 | 5.31 | 0.09 | 1.27 | 0.02 | 0.27 | 0.00 | 0.018 | 0.000 |
| 100 | 0.23 | 0.01 | 1.53 | 0.02 | 4.67 | 0.07 | 1.09 | 0.02 | 0.26 | 0.00 | 0.018 | 0.000 |
| 101 | 0.32 | 0.01 | 1.54 | 0.02 | 5.43 | 0.08 | 1.31 | 0.02 | 0.27 | 0.00 | 0.016 | 0.000 |

|     |       |      |      |      |      |      |      |      |      |      |       |       |
|-----|-------|------|------|------|------|------|------|------|------|------|-------|-------|
| 103 | 0.38  | 0.01 | 1.59 | 0.02 | 5.94 | 0.08 | 1.45 | 0.02 | 0.28 | 0.00 | 0.015 | 0.000 |
| 104 | 0.44  | 0.02 | 1.72 | 0.02 | 6.65 | 0.11 | 1.63 | 0.03 | 0.30 | 0.00 | 0.015 | 0.001 |
| 105 | 0.39  | 0.01 | 1.68 | 0.02 | 6.67 | 0.13 | 1.64 | 0.04 | 0.29 | 0.00 | 0.016 | 0.000 |
| 106 | 0.37  | 0.01 | 1.59 | 0.02 | 5.82 | 0.08 | 1.41 | 0.02 | 0.28 | 0.00 | 0.016 | 0.000 |
| 107 | 0.27  | 0.01 | 1.50 | 0.02 | 5.05 | 0.08 | 1.20 | 0.02 | 0.26 | 0.00 | 0.017 | 0.000 |
| 108 |       |      | 1.51 | 0.02 |      |      |      |      |      |      |       |       |
| 109 | 0.18  | 0.01 | 1.51 | 0.02 | 4.48 | 0.06 | 1.04 | 0.02 | 0.25 | 0.00 | 0.019 | 0.000 |
| 111 | 0.13  | 0.00 | 1.47 | 0.01 | 4.31 | 0.06 | 1.00 | 0.02 | 0.25 | 0.00 | 0.020 | 0.000 |
| 112 | 0.09  | 0.02 | 1.43 | 0.01 | 4.05 | 0.05 | 0.92 | 0.01 | 0.24 | 0.00 | 0.020 | 0.000 |
| 113 | 0.21  | 0.01 | 1.53 | 0.01 | 4.17 | 0.05 | 0.95 | 0.01 | 0.26 | 0.00 | 0.019 | 0.000 |
| 114 | 0.19  | 0.02 | 1.55 | 0.02 | 4.60 | 0.07 | 1.06 | 0.02 | 0.26 | 0.00 | 0.020 | 0.001 |
| 115 | 0.28  | 0.01 | 1.60 | 0.02 | 4.45 | 0.06 | 1.02 | 0.02 | 0.27 | 0.00 | 0.018 | 0.000 |
| 116 | 0.26  | 0.01 | 1.61 | 0.02 | 4.69 | 0.07 | 1.08 | 0.02 | 0.28 | 0.00 | 0.019 | 0.000 |
| 117 | 0.28  | 0.02 | 1.67 | 0.02 | 4.33 | 0.06 | 0.97 | 0.02 | 0.29 | 0.00 | 0.019 | 0.001 |
| 118 | 0.32  | 0.02 | 1.63 | 0.01 | 4.17 | 0.05 | 0.93 | 0.01 | 0.28 | 0.00 | 0.017 | 0.001 |
| 119 | 0.24  | 0.01 | 1.69 | 0.02 | 4.71 | 0.07 | 1.07 | 0.02 | 0.29 | 0.00 | 0.020 | 0.000 |
| 120 | 0.19  | 0.00 | 1.59 | 0.01 | 4.01 | 0.04 | 0.89 | 0.01 | 0.27 | 0.00 | 0.020 | 0.000 |
| 121 | 0.12  | 0.01 | 1.52 | 0.01 | 3.41 | 0.04 | 0.73 | 0.01 | 0.25 | 0.00 | 0.021 | 0.000 |
| 123 | -0.42 | 0.05 | 1.28 | 0.01 | 2.22 | 0.02 | 0.42 | 0.01 | 0.20 | 0.00 | 0.028 | 0.001 |

**10 M urea** 15N Relaxation Data

| Residue | NOE   | NOE error | R1   | R1 error | R2   | R2 error | J(0) | J(0) error | J(N) | J(N) error | J(0.87H) | J(0.87H) error |
|---------|-------|-----------|------|----------|------|----------|------|------------|------|------------|----------|----------------|
| 1       | -0.23 | 0.01      | 1.37 | 0.01     | 1.91 | 0.01     | 0.32 | 0.00       | 0.22 | 0.00       | 0.026    | 0.000          |
| 4       | 0.23  | 0.02      | 1.70 | 0.01     | 3.95 | 0.03     | 0.86 | 0.01       | 0.29 | 0.00       | 0.020    | 0.001          |
| 7       | 0.27  | 0.02      | 1.65 | 0.01     | 4.52 | 0.04     | 1.03 | 0.01       | 0.28 | 0.00       | 0.019    | 0.000          |
| 8       | 0.31  | 0.02      | 1.71 | 0.01     | 4.86 | 0.04     | 1.12 | 0.01       | 0.29 | 0.00       | 0.019    | 0.001          |
| 9       | 0.31  | 0.02      | 1.60 | 0.01     | 5.00 | 0.04     | 1.17 | 0.01       | 0.28 | 0.00       | 0.017    | 0.000          |
| 10      | 0.25  | 0.02      | 1.68 | 0.01     | 5.08 | 0.04     | 1.18 | 0.01       | 0.29 | 0.00       | 0.020    | 0.000          |
| 11      | 0.34  | 0.02      | 1.67 | 0.01     | 5.21 | 0.04     | 1.22 | 0.02       | 0.29 | 0.00       | 0.017    | 0.000          |
| 13      | 0.39  | 0.02      | 1.63 | 0.01     | 5.18 | 0.06     | 1.22 | 0.01       | 0.28 | 0.00       | 0.015    | 0.001          |
| 14      |       |           | 1.71 | 0.01     | 5.21 | 0.06     |      |            |      |            |          |                |
| 17      | 0.27  | 0.02      | 1.64 | 0.01     | 4.07 | 0.03     | 0.91 | 0.01       | 0.28 | 0.00       | 0.019    | 0.000          |
| 19      | 0.23  | 0.02      | 1.68 | 0.01     | 3.78 | 0.03     | 0.81 | 0.01       | 0.28 | 0.00       | 0.020    | 0.000          |
| 20      | 0.21  | 0.01      | 1.65 | 0.01     | 3.58 | 0.02     | 0.76 | 0.01       | 0.28 | 0.00       | 0.020    | 0.000          |
| 21      | 0.21  | 0.02      | 1.55 | 0.01     | 4.38 | 0.03     | 1.00 | 0.01       | 0.26 | 0.00       | 0.019    | 0.000          |
| 22      | 0.20  | 0.02      | 1.61 | 0.01     | 4.41 | 0.03     | 1.00 | 0.01       | 0.27 | 0.00       | 0.020    | 0.000          |
| 23      | 0.17  | 0.02      | 1.47 | 0.01     | 4.85 | 0.04     | 1.15 | 0.01       | 0.25 | 0.00       | 0.019    | 0.000          |
| 25      |       |           | 1.57 | 0.01     | 5.61 | 0.07     |      |            |      |            |          |                |
| 26      | 0.32  | 0.02      | 1.58 | 0.01     | 5.25 | 0.06     | 1.25 | 0.01       | 0.27 | 0.00       | 0.017    | 0.001          |
| 28      | 0.17  | 0.02      | 1.54 | 0.01     | 5.68 | 0.07     | 1.37 | 0.02       | 0.26 | 0.00       | 0.020    | 0.001          |
| 29      | 0.16  | 0.02      | 1.47 | 0.01     | 5.07 | 0.06     | 1.21 | 0.02       | 0.25 | 0.00       | 0.019    | 0.000          |
| 31      | 0.24  | 0.02      | 1.58 | 0.01     | 4.80 | 0.05     | 1.12 | 0.01       | 0.27 | 0.00       | 0.019    | 0.000          |
| 32      | 0.23  | 0.02      | 1.66 | 0.01     | 4.81 | 0.05     | 1.11 | 0.01       | 0.28 | 0.00       | 0.020    | 0.001          |
| 33      | 0.29  | 0.02      | 1.63 | 0.01     | 4.55 | 0.04     | 1.04 | 0.01       | 0.28 | 0.00       | 0.018    | 0.000          |
| 34      | 0.19  | 0.02      | 1.62 | 0.01     | 4.40 | 0.03     | 0.99 | 0.01       | 0.27 | 0.00       | 0.020    | 0.000          |
| 35      | 0.21  | 0.01      | 1.63 | 0.01     | 3.72 | 0.02     | 0.80 | 0.01       | 0.28 | 0.00       | 0.020    | 0.000          |
| 37      | 0.25  | 0.02      | 1.62 | 0.01     | 4.64 | 0.05     | 1.07 | 0.01       | 0.28 | 0.00       | 0.019    | 0.001          |
| 38      | 0.25  | 0.02      | 1.63 | 0.01     | 4.55 | 0.04     | 1.04 | 0.01       | 0.28 | 0.00       | 0.019    | 0.000          |
| 39      | 0.31  | 0.02      | 1.64 | 0.01     | 5.21 | 0.05     | 1.23 | 0.02       | 0.28 | 0.00       | 0.018    | 0.001          |
| 40      | 0.31  | 0.02      | 1.59 | 0.01     | 4.56 | 0.03     | 1.05 | 0.01       | 0.27 | 0.00       | 0.017    | 0.000          |
| 42      | 0.25  | 0.02      | 1.57 | 0.02     | 4.96 | 0.06     | 1.17 | 0.02       | 0.27 | 0.00       | 0.018    | 0.001          |
| 43      | 0.22  | 0.02      | 1.65 | 0.01     | 5.24 | 0.06     | 1.23 | 0.02       | 0.28 | 0.00       | 0.020    | 0.001          |
| 44      | 0.28  | 0.02      | 1.60 | 0.01     | 4.75 | 0.04     | 1.11 | 0.01       | 0.27 | 0.00       | 0.018    | 0.000          |
| 45      | 0.29  | 0.02      | 1.62 | 0.01     | 4.67 | 0.04     | 1.08 | 0.01       | 0.28 | 0.00       | 0.018    | 0.000          |
| 46      | 0.30  | 0.02      | 1.69 | 0.01     | 4.63 | 0.04     | 1.06 | 0.01       | 0.29 | 0.00       | 0.019    | 0.000          |
| 47      | 0.31  | 0.02      | 1.68 | 0.01     | 4.68 | 0.03     | 1.07 | 0.01       | 0.29 | 0.00       | 0.018    | 0.000          |

|    |      |      |      |      |      |      |      |      |      |      |       |       |
|----|------|------|------|------|------|------|------|------|------|------|-------|-------|
| 48 | 0.34 | 0.02 | 1.66 | 0.01 | 4.89 | 0.04 | 1.13 | 0.01 | 0.29 | 0.00 | 0.017 | 0.000 |
| 50 | 0.37 | 0.02 | 1.71 | 0.01 | 5.11 | 0.04 | 1.19 | 0.01 | 0.30 | 0.00 | 0.017 | 0.000 |
| 51 | 0.32 | 0.02 | 1.74 | 0.01 | 4.57 | 0.04 | 1.03 | 0.01 | 0.30 | 0.00 | 0.019 | 0.001 |
| 52 | 0.36 | 0.02 | 1.70 | 0.01 | 5.03 | 0.04 | 1.17 | 0.01 | 0.29 | 0.00 | 0.017 | 0.000 |
| 53 | 0.31 | 0.02 | 1.64 | 0.01 | 4.85 | 0.05 | 1.13 | 0.01 | 0.28 | 0.00 | 0.018 | 0.000 |
| 54 | 0.33 | 0.02 | 1.65 | 0.01 | 4.92 | 0.04 | 1.15 | 0.01 | 0.29 | 0.00 | 0.017 | 0.000 |
| 58 | 0.30 | 0.02 | 1.63 | 0.01 | 5.11 | 0.04 | 1.20 | 0.02 | 0.28 | 0.00 | 0.018 | 0.000 |
| 59 | 0.39 | 0.02 | 1.70 | 0.01 | 5.31 | 0.05 | 1.25 | 0.02 | 0.30 | 0.00 | 0.016 | 0.001 |
| 62 | 0.19 | 0.02 | 1.57 | 0.01 | 4.75 | 0.04 | 1.10 | 0.01 | 0.27 | 0.00 | 0.020 | 0.000 |
| 63 | 0.21 | 0.02 | 1.56 | 0.01 | 4.69 | 0.04 | 1.09 | 0.01 | 0.26 | 0.00 | 0.019 | 0.000 |
| 64 | 0.12 | 0.02 | 1.56 | 0.01 | 4.63 | 0.04 | 1.07 | 0.01 | 0.26 | 0.00 | 0.021 | 0.000 |
| 65 | 0.22 | 0.02 | 1.65 | 0.01 | 4.38 | 0.04 | 0.99 | 0.01 | 0.28 | 0.00 | 0.020 | 0.000 |
| 68 | 0.33 | 0.02 | 1.70 | 0.01 | 4.54 | 0.04 | 1.03 | 0.01 | 0.29 | 0.00 | 0.018 | 0.001 |
| 69 | 0.21 | 0.02 | 1.56 | 0.01 | 4.77 | 0.04 | 1.11 | 0.01 | 0.26 | 0.00 | 0.019 | 0.000 |
| 70 | 0.26 | 0.02 | 1.63 | 0.01 | 4.80 | 0.04 | 1.11 | 0.01 | 0.28 | 0.00 | 0.019 | 0.000 |
| 71 |      |      | 1.67 | 0.01 | 4.62 | 0.05 |      |      |      |      |       |       |
| 72 | 0.22 | 0.02 | 1.56 | 0.01 | 4.47 | 0.04 | 1.03 | 0.01 | 0.27 | 0.00 | 0.019 | 0.000 |
| 73 | 0.31 | 0.02 | 1.67 | 0.01 | 5.04 | 0.04 | 1.18 | 0.01 | 0.29 | 0.00 | 0.018 | 0.000 |
| 74 | 0.29 | 0.02 | 1.58 | 0.01 | 4.76 | 0.04 | 1.11 | 0.01 | 0.27 | 0.00 | 0.017 | 0.000 |
| 75 | 0.29 | 0.01 | 1.60 | 0.01 | 4.58 | 0.03 | 1.06 | 0.01 | 0.27 | 0.00 | 0.018 | 0.000 |
| 76 |      |      | 1.61 | 0.01 | 5.16 | 0.04 |      |      |      |      |       |       |
| 78 | 0.29 | 0.02 | 1.63 | 0.01 | 4.81 | 0.03 | 1.11 | 0.01 | 0.28 | 0.00 | 0.018 | 0.000 |
| 79 | 0.35 | 0.02 | 1.65 | 0.01 | 4.95 | 0.04 | 1.15 | 0.01 | 0.29 | 0.00 | 0.017 | 0.000 |
| 80 |      |      | 1.69 | 0.01 | 4.30 | 0.02 |      |      |      |      |       |       |
| 81 | 0.37 | 0.02 | 1.71 | 0.01 | 5.31 | 0.05 | 1.25 | 0.02 | 0.30 | 0.00 | 0.017 | 0.001 |
| 84 |      |      | 1.66 | 0.01 | 5.15 | 0.04 |      |      |      |      |       |       |
| 85 | 0.35 | 0.02 | 1.65 | 0.01 | 4.87 | 0.04 | 1.13 | 0.01 | 0.29 | 0.00 | 0.017 | 0.000 |
| 86 | 0.33 | 0.02 | 1.68 | 0.01 | 5.40 | 0.05 | 1.28 | 0.02 | 0.29 | 0.00 | 0.017 | 0.001 |
| 87 |      |      | 1.66 | 0.01 | 5.11 | 0.05 |      |      |      |      |       |       |
| 88 | 0.27 | 0.02 | 1.64 | 0.01 | 4.80 | 0.04 | 1.11 | 0.01 | 0.28 | 0.00 | 0.019 | 0.000 |
| 89 | 0.27 | 0.02 | 1.61 | 0.01 | 4.85 | 0.04 | 1.13 | 0.01 | 0.28 | 0.00 | 0.018 | 0.000 |
| 90 | 0.27 | 0.02 | 1.61 | 0.01 | 5.38 | 0.06 | 1.28 | 0.02 | 0.28 | 0.00 | 0.018 | 0.001 |
| 92 | 0.14 | 0.02 | 1.42 | 0.01 | 4.62 | 0.04 | 1.09 | 0.01 | 0.24 | 0.00 | 0.019 | 0.000 |
| 93 | 0.19 | 0.02 | 1.48 | 0.01 | 5.10 | 0.05 | 1.22 | 0.02 | 0.25 | 0.00 | 0.019 | 0.000 |
| 95 | 0.22 | 0.02 | 1.55 | 0.02 | 5.61 | 0.08 | 1.35 | 0.03 | 0.26 | 0.00 | 0.019 | 0.001 |
| 96 | 0.26 | 0.02 | 1.58 | 0.02 | 5.84 | 0.08 | 1.42 | 0.02 | 0.27 | 0.00 | 0.018 | 0.001 |



**RDC values**

| Residue | 4 M urea | 6 M urea | 8 M urea | 10 M urea |
|---------|----------|----------|----------|-----------|
| 1       | 1.03     | 0.88     | 0.42     | 0.46      |
| 2       | 1.26     | 0.67     | 0.82     | 0.76      |
| 4       |          | 0.61     |          | 1.06      |
| 5       |          | 0.76     | 1.18     |           |
| 6       |          | -0.67    |          |           |
| 7       |          | 1.00     | 0.76     | 0.42      |
| 8       |          | 0.36     | 1.03     | 0.88      |
| 9       |          |          | 1.15     | 0.97      |
| 11      |          |          | 0.61     | 0.52      |
| 13      |          |          |          | 1.03      |
| 14      |          |          | 2.00     | 1.43      |
| 16      |          | -0.06    | 1.09     | 1.09      |
| 17      |          | -0.39    | -0.03    | 0.27      |
| 19      |          | 0.06     | 0.39     | 0.58      |
| 20      |          | 0.52     | 0.58     | 0.46      |
| 21      |          | 2.25     | 1.79     |           |
| 22      |          | 2.49     | 1.58     | 0.79      |
| 23      |          | 2.55     | 3.07     | 2.58      |
| 25      |          |          | 2.31     | 2.34      |
| 26      |          | 2.94     | 2.16     | 1.21      |
| 28      |          |          | 0.30     | 1.88      |
| 29      |          | 0.27     | 1.43     | 1.31      |
| 31      |          |          |          | 2.00      |
| 32      |          |          | 1.37     | 1.55      |
| 33      |          | 2.00     | 1.52     | 1.58      |
| 34      | 1.18     | 1.49     | 1.21     | 1.31      |
| 35      | 0.90     | 0.91     | 1.00     | 0.70      |
| 37      | 1.13     |          |          |           |
| 38      | 0.76     | 0.82     | 0.82     | 0.91      |
| 39      | 0.54     | 1.09     | 0.52     |           |
| 40      |          | 0.88     | 0.97     | 1.24      |
| 41      | 2.09     |          |          |           |
| 42      |          | 2.03     | 2.49     | 1.67      |
| 43      |          | 1.76     | 1.79     | 2.19      |
| 44      |          | 1.67     | 1.49     |           |
| 45      | 0.43     | 1.24     | 1.03     | 1.09      |
| 46      | 0.09     |          | 0.42     | 0.30      |
| 47      | 0.65     | 0.27     | 0.58     | 0.06      |
| 48      | 0.29     |          |          | 0.91      |
| 50      | 0.02     | 0.06     | 0.49     | 0.30      |
| 51      | -0.04    | 0.21     | 0.64     | 0.61      |
| 52      | 0.27     | 0.27     | 0.73     | 0.79      |
| 53      |          | 1.06     | 1.06     | 1.24      |
| 54      | 1.12     |          | 2.00     | 1.37      |
| 55      |          | 0.94     |          |           |
| 57      |          | 1.15     | 1.94     | 1.27      |
| 58      | 0.16     | 1.12     |          | 0.55      |
| 59      |          | 0.79     | 0.94     | 0.94      |
| 60      |          | 0.79     | 0.94     |           |
| 61      | 0.44     | 0.58     | 1.15     |           |
| 62      | 0.92     | 1.58     | 1.91     | 1.43      |
| 63      | 1.03     | 1.64     | 1.67     | 1.58      |
| 64      |          | 1.49     | 1.46     | 1.58      |
| 65      |          | 1.49     | 1.70     | 1.73      |

|     |       |       |       |       |
|-----|-------|-------|-------|-------|
| 66  |       | 1.88  |       | 1.06  |
| 68  | 1.42  |       |       |       |
| 69  |       | 1.94  | 1.91  | 1.70  |
| 70  | 0.98  | 1.73  | 1.73  | 1.67  |
| 71  |       | 1.00  | 1.21  |       |
| 72  | 0.78  | 1.09  | 1.43  | 1.31  |
| 73  |       | 0.73  | 1.00  | 0.70  |
| 74  | 0.54  | 0.79  | 0.88  | 1.21  |
| 76  |       |       |       | 0.70  |
| 77  | -0.13 | 0.03  | 0.58  |       |
| 78  | -0.02 | 0.58  | 0.88  | 0.82  |
| 79  | 0.02  |       | 0.85  | 0.88  |
| 80  | -1.11 | 0.39  |       |       |
| 81  |       | 0.15  | 0.42  | 0.64  |
| 84  |       |       |       | 0.67  |
| 86  |       | 0.94  | 0.79  | 1.15  |
| 87  | 0.22  |       | 0.85  | 1.18  |
| 88  | 0.52  | 0.64  | 0.94  | 1.03  |
| 89  |       | 0.76  |       | 1.31  |
| 90  |       | 1.24  | 0.76  | 1.40  |
| 91  |       | 1.27  | 2.34  |       |
| 92  |       | 1.49  | 1.94  | 1.94  |
| 93  |       | 1.58  | 2.00  | 2.12  |
| 94  |       | 2.19  |       |       |
| 95  |       | 2.52  | 2.85  | 2.25  |
| 96  |       | 1.00  | 2.31  | 2.06  |
| 97  |       | 1.37  | 1.82  | 2.12  |
| 98  |       | 1.67  | 1.55  |       |
| 99  |       | 1.37  | 1.49  | 1.27  |
| 100 |       | 1.24  | 1.15  | 1.61  |
| 101 |       | 0.52  | 0.73  |       |
| 102 |       | 0.76  |       |       |
| 103 |       | -0.46 | -0.24 | -0.18 |
| 104 |       | -0.61 | -0.64 | -0.55 |
| 105 |       | -0.64 | -0.30 | -0.70 |
| 106 |       | 0.46  | 1.46  | 0.73  |
| 107 |       | 0.91  | 1.09  | 1.40  |
| 108 |       | 1.58  |       |       |
| 109 |       | 0.76  | 1.43  | 1.64  |
| 111 |       |       | 1.55  | 1.88  |
| 112 | 0.95  | 0.88  | 1.12  | 1.18  |
| 113 |       | 1.31  |       | 1.09  |
| 114 |       | 0.88  | 1.73  | 0.97  |
| 115 |       | 1.27  | 1.43  | 1.40  |
| 116 |       |       | 1.06  | 1.09  |
| 117 |       | 1.06  | 1.21  | 1.12  |
| 118 | -0.73 | 0.12  | 0.55  |       |
| 119 |       | -0.33 | 0.18  | 0.03  |
| 120 |       | 0.21  | 0.55  | 0.91  |
| 121 |       | 0.58  | 0.94  | 0.61  |
| 122 |       | 0.94  |       |       |
| 123 |       | 0.36  | 0.36  | 0.55  |
